# Supplementary material for: Multivariate Hawkes process models of the occurrence of regulatory elements
Source: Springer Nature journal article supplement (doi:10.1186/1471-2105-11-456), 2010-09-09

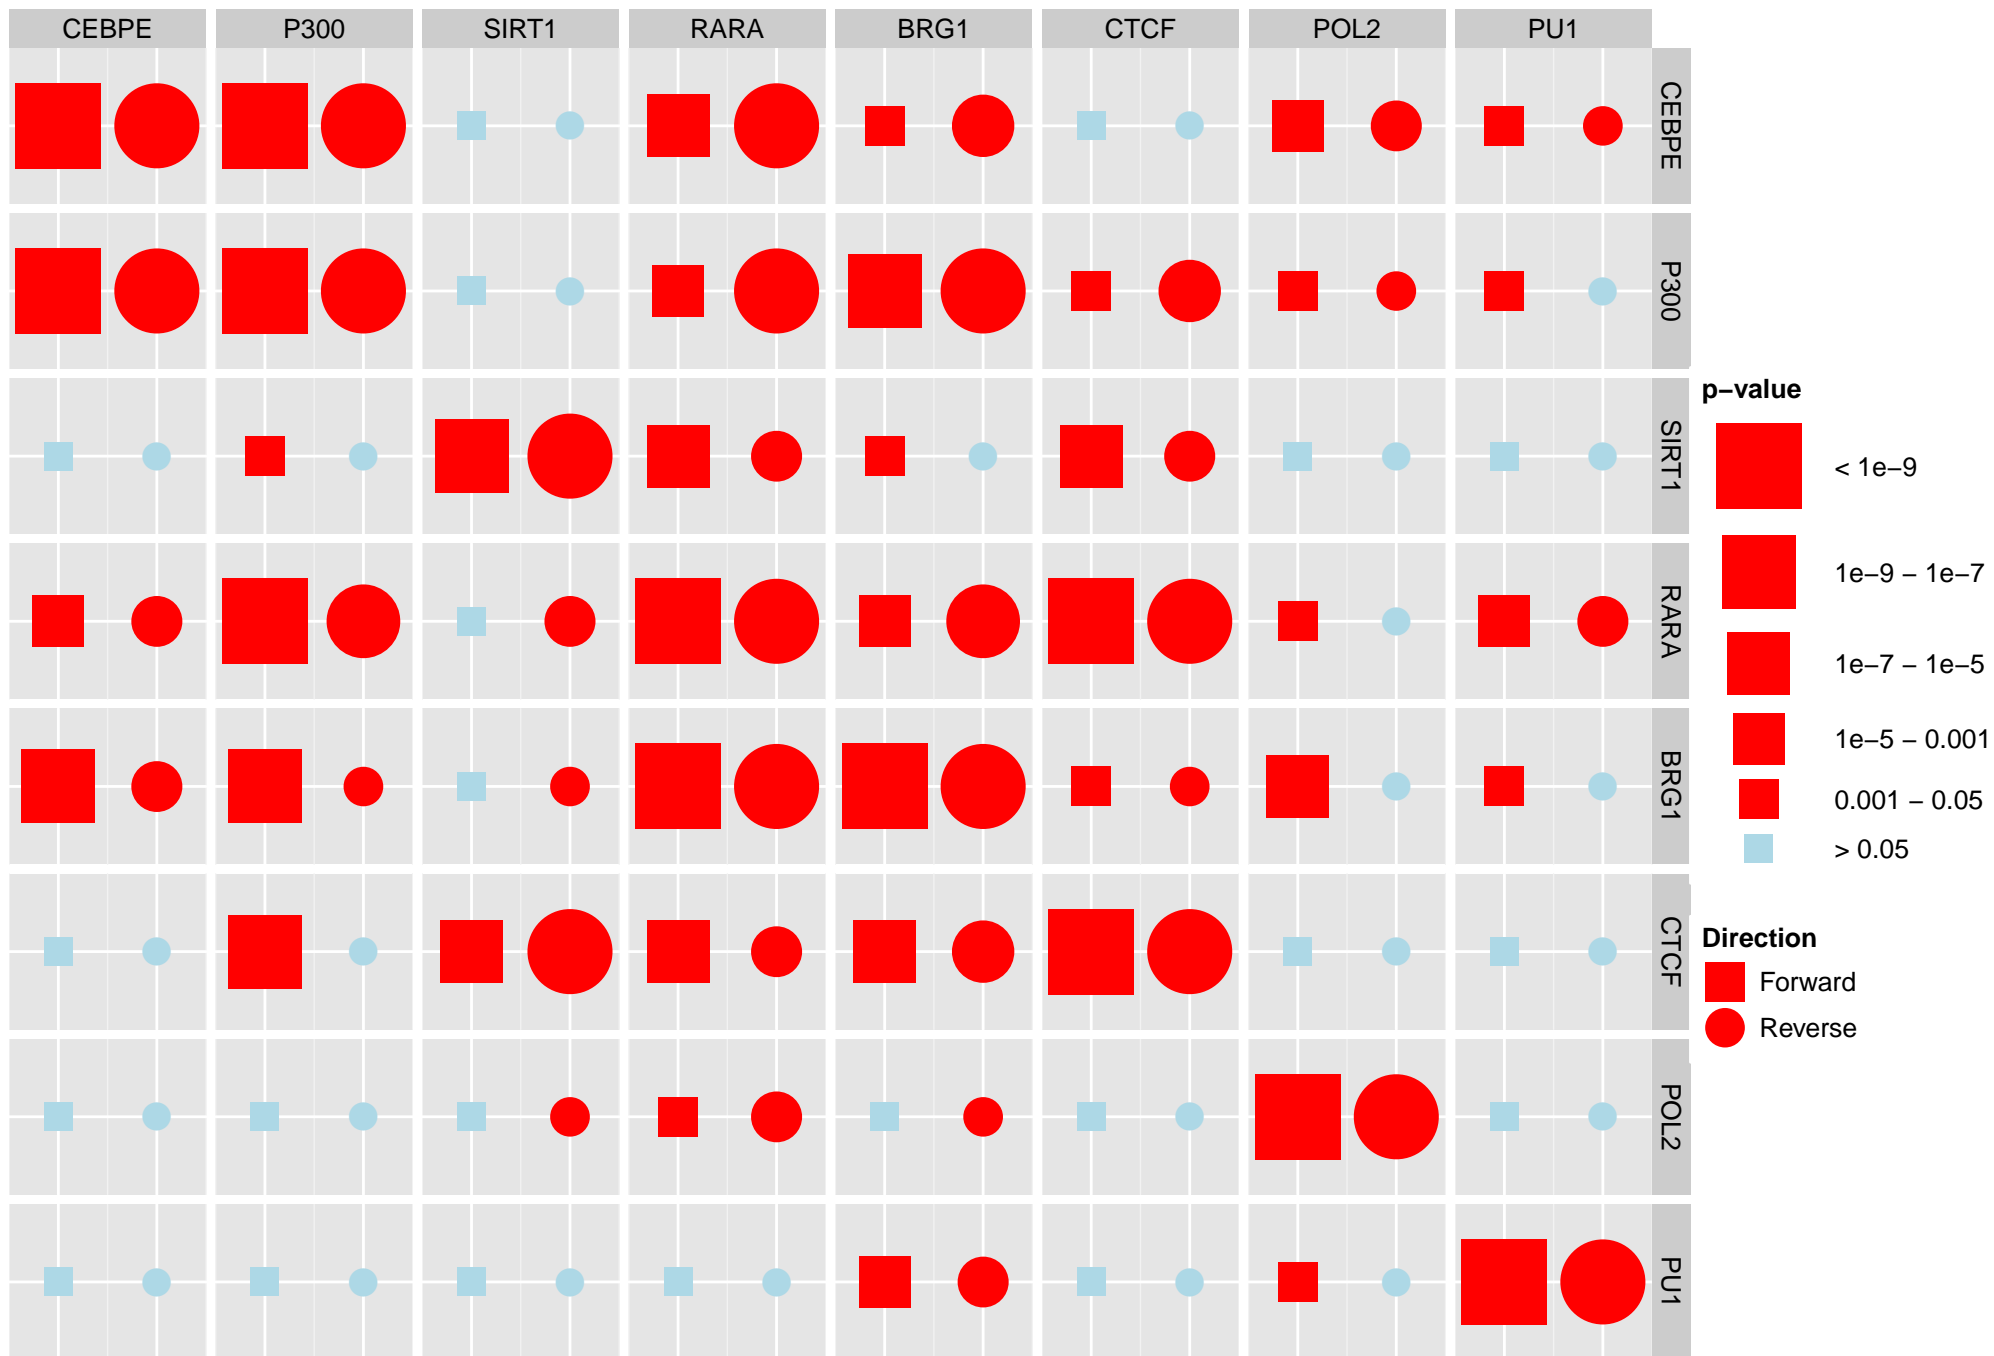

Supplement: 12859_2010_3913_MOESM17_ESM.pdf [file 12859_2010_3913_MOESM17_ESM.pdf]
